# Supplementary material for: Covalent modification of black phosphorus with alkoxy groups to improve the solubility and ambient stability
Source: Royal Society of Chemistry journal article supplement (doi:10.1039/d1nr04315c), 2021-01-01
Supplement: d1nr04315c1.pdf [file d1nr04315c1.pdf]

# Supporting Information

## Covalent modification of Black phosphorus with alkoxy group to improve the solubility and ambient stability

Yun Zhao<sup>1, #, \*</sup>, Yan Jiang<sup>1, #</sup>, Menglu He<sup>1</sup>, Gang Jiang<sup>1</sup>, Xuguang Zhu<sup>1</sup>, Yue Tian<sup>2, \*</sup>,  
Zhonghai Ni<sup>1, \*</sup>

*<sup>1</sup>School of Chemical Engineering and Technology, China University of Mining and  
Technology, Xuzhou 221116, China*

*<sup>2</sup>Institute of New Carbon Materials, Taiyuan University of Technology, Taiyuan  
030024, China*

### **Corresponding Author**

\* Prof. Y. Zhao, E-mail: zhaoyun@cumt.edu.cn.

\* Prof. Y. Tian, E-mail: tianyue@tyut.edu.cn.

\* Prof. Z. Ni, E-mail: nizhonghai@cumt.edu.cn.

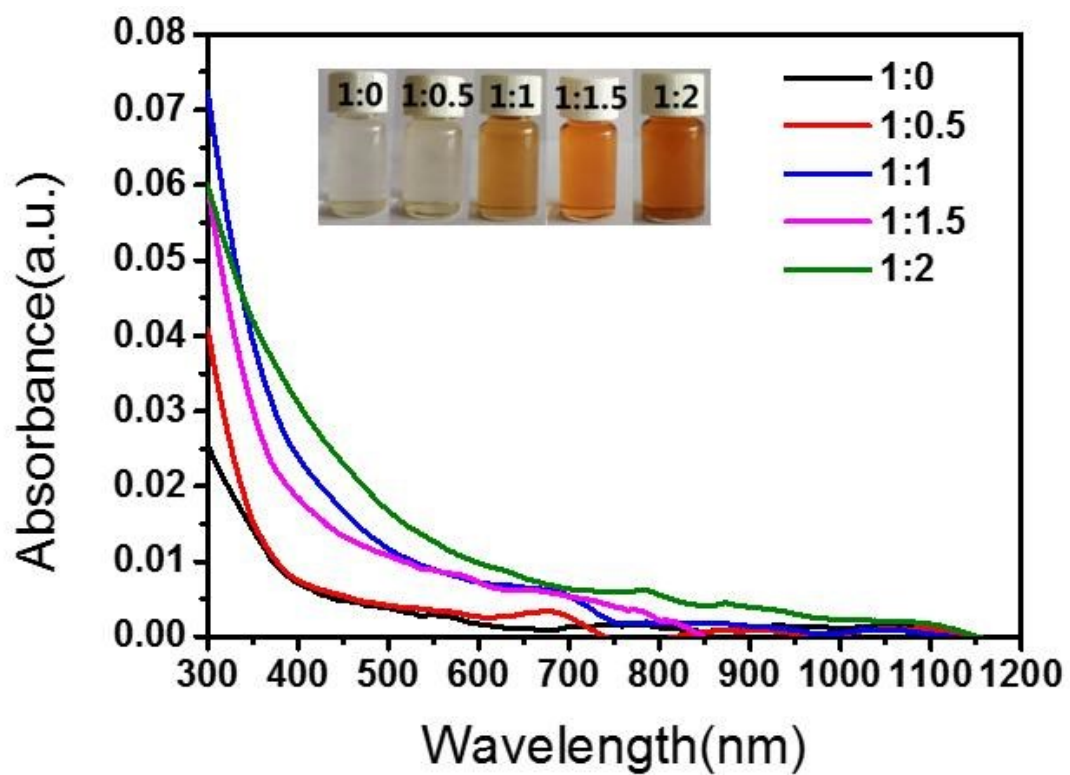

**Figure S1.** UV-Vis absorption spectra of the modified BP dispersion obtained with different molar ratios of BP and Sodium methoxide.

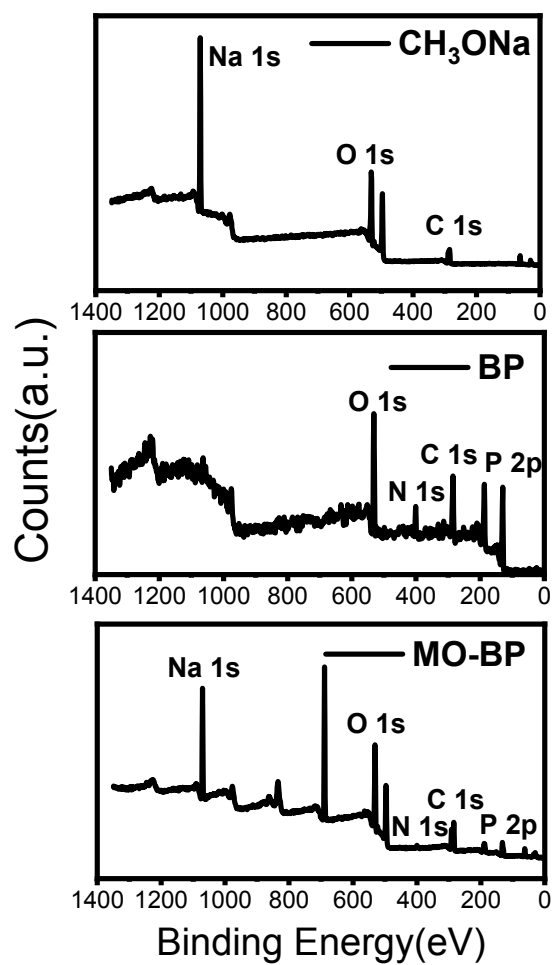

**Figure S2.** The XPS survey spectra of sodium methoxide ( $\text{CH}_3\text{ONa}$ ), control BP and MO-BP.

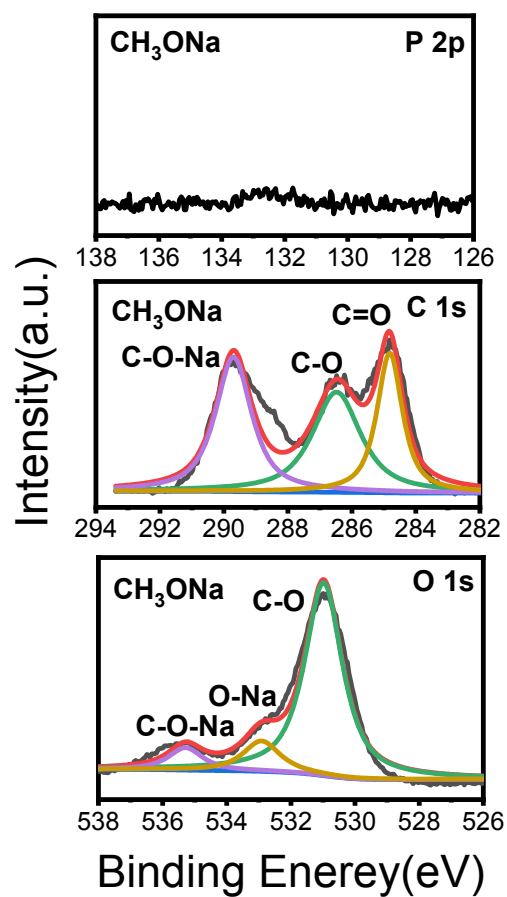

**Figure S3. XPS wide scan spectra of the  $\text{CH}_3\text{ONa}$ : P 2p core-level, C 1s core-level, O 1s core-level.**

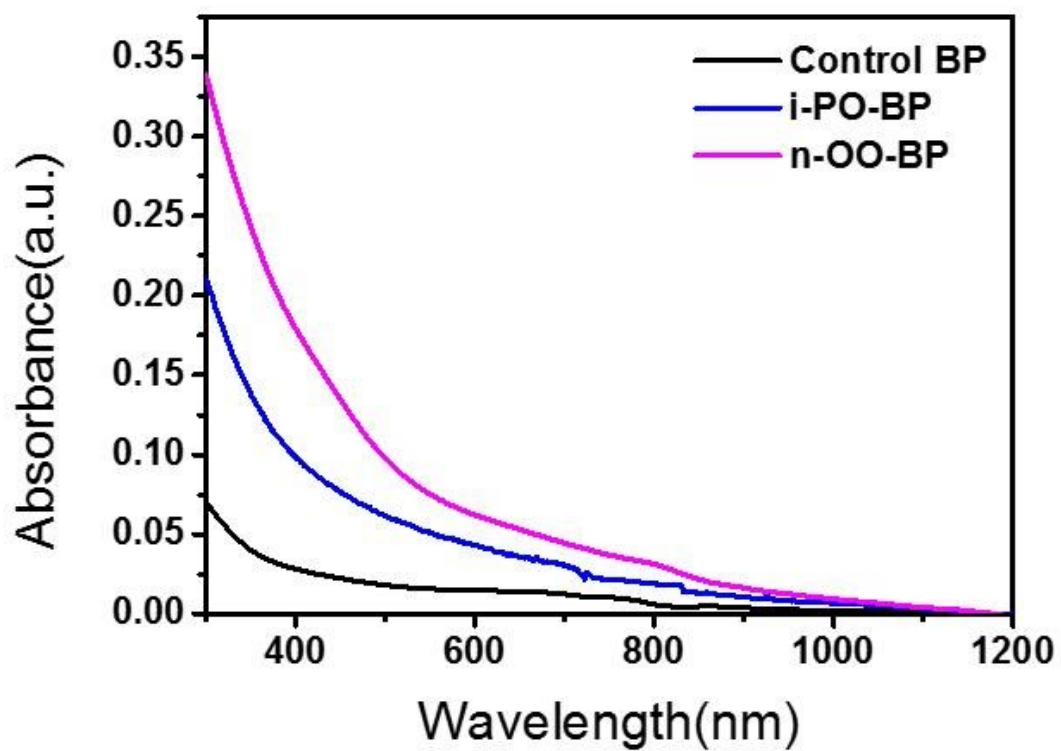

**Figure S4. UV-Vis absorption spectra of the control BP and isopropoxy and n-octyloxy modified BP dispersion in DMF.**
